# Supplementary material
Source: PubMed Central journal article supplement (PMC1276170)

1 **Supplementary information to Peters *et al.* “Wound-healing defect of CD18<sup>-/-</sup> mice**  
2 **due to a decrease in TGF-β<sub>1</sub> and myofibroblast differentiation”**

3  
4 **Supplementary data 1 (Figure S1).** Local injection of TGF-β<sub>1</sub> does not restore PMN recruit-  
5 ment in CD18<sup>-/-</sup> mice. H&E stainings were prepared from paraffin-embedded sections of CD18<sup>-/-</sup>  
6 and WT mice using wounds 6 h, 24 h, 5 and 7 days after wounding which had been injected with  
7 either TGF-β<sub>1</sub> or NaCl. Extravasated PMN within the dermis of the wound margins were identi-  
8 fied by morphology and counted in 10 high power fields (HPF) at 40x magnification on a light  
9 microscope. Data are given in mean calculated out of 10 HPF. \* *P* <0.05; \*\* *P* <0.005.

10  
11 **Supplementary data 2 (Figure S2):** Enhanced release of pro-inflammatory cytokines by CD18<sup>-/-</sup>  
12 macrophages *in vitro*. Mature BM-derived macrophages from CD18<sup>-/-</sup> and WT mice were in-  
13 cubated in presence of 20 ng LPS (purified from *E. coli*; Sigma)/ml DMEM for 24 h at 37°C and  
14 5% CO<sub>2</sub>. Supernatants were harvested and subjected to ELISA for murine IL-1α, IL-1β and IL-6,  
15 according to the manufacturer’s protocols (all R&D Systems). Data are depicted as the mean ±  
16 SD. \* *P* <0.05, \*\* *P* <0.005.

17  
18 **Supplementary data 3 (Figure S3).** Phagocytosis as such and the associated release of active  
19 TGF-β<sub>1</sub> is not impaired in CD18<sup>-/-</sup> macrophages. To address whether in the absence of CD18,  
20 phagocytosis as such is still functional or whether a general incapability of phagocytosis could  
21 have caused a defective uptake of apoptotic PMN (A) and an impaired secretion of active TGF-β<sub>1</sub>  
22 (B), CD18<sup>-/-</sup> (Mφ<sup>-</sup>) or WT (Mφ<sup>+</sup>) macrophages were co-cultured with latex beads (L) (Fluo-  
23 Spheres® 2.0-μm yellow/green-fluorescent microspheres; Molecular Probes, Karlsruhe, Ger-

1 many) instead of apoptotic PMN, indicative of receptor-independent phagocytosis (Iyoda *et al*,  
2 2002). **(A)** Phagocytosis of latex beads by CD18<sup>-/-</sup> macrophages was only slightly but not  
3 significantly reduced. **(B)** The release of active TGF-β<sub>1</sub>, concomitant to latex beads phagocytosis,  
4 by CD18<sup>-/-</sup> macrophages was significantly reduced compared to WT macrophages, although not  
5 at all down to levels occurring without latex beads or apoptotic PMN, or in presence of cyto-  
6 chalasin B/C fully blocking the phagocytic machinery. These data demonstrate that the reduced  
7 uptake of apoptotic PMN in the absence of CD18 does rather not reflect a general incapability of  
8 phagocytosis of CD18<sup>-/-</sup> macrophages, nor a complete impairment to secrete active TGF-β<sub>1</sub>. – To  
9 further distinguish base level secretion of active TGF-β<sub>1</sub> from macrophages induced by mere  
10 adhesional interaction with apoptotic PMN from specific uptake-induced (phagocytotic) release  
11 of active TGF-β<sub>1</sub>, experiments were repeated in the presence of the actin-filament polymeris-  
12 ation-blocking agents cytochalasin B and C. The latter substances have been previously reported  
13 to selectively block phagocytotic uptake of cells whereas they do not interfere with the secretion  
14 of various cytokines (Demuth *et al*, 1996; Painter *et al*, 1981) or CD18 avidity (Katagiri *et al*,  
15 1996). In brief, CD18<sup>-/-</sup> (Mφ<sup>-</sup>) or WT (Mφ<sup>+</sup>) macrophages were pre-incubated for 30 min in  
16 complete DMEM containing 2 μg/ml cytochalasin B, or cytochalasin C (both from Sigma), at  
17 37°C in an atmosphere of 5% CO<sub>2</sub>. Apoptotic CD18<sup>-/-</sup> (N<sup>-</sup>) or WT (N<sup>+</sup>) PMN, or latex beads (L)  
18 were added and supernatants for ELISA measurement of active TGF-β<sub>1</sub> were taken 24 h later.  
19 Data are depicted as the mean ± SD. \* *P* <0.05, \*\* *P* <0.005. **(B)** As biological controls for  
20 release of active TGF-β<sub>1</sub> identifying background-level release of TGF-β<sub>1</sub> from dying/necrotic  
21 cells during co-culturing, similar experiments were done at 4°C for a period of 24 h, and com-  
22 pared to incubation at 37°C (Figure 6A). Data are given as the mean ± SD.

23

1 **Supplementary data 4 (Figure S4):** Macrophage phenotype in CD18<sup>-/-</sup> mice. (A) BM-derived  
2 macrophages isolated from CD18<sup>-/-</sup> and WT were compared by FACS phenotyping using staining  
3 for the macrophage differentiation markers F4/80, MOMA-2, ICAM-1 and scavenger receptor  
4 class B (CD36). These markers showed a highly similar expression pattern on CD18<sup>-/-</sup> and WT  
5 BM-derived macrophages, indicating that CD18 deficiency does not affect the *in vitro* maturation  
6 and differentiation of murine BM-derived macrophages. (B) BM-derived (left graph) and mature  
7 peritoneal (right graph) CD18<sup>-/-</sup> (-) or WT (+) macrophages (M $\phi$ ) were co-cultured with apoptotic  
8 CD18<sup>-/-</sup> or WT PMN in a similar *in vitro* setting as shown in Fig. 6A. After 24 h, supernatants of  
9 co-cultures were subjected to ELISA to detect active TGF- $\beta$ <sub>1</sub>. Data are given as the mean  $\pm$  SD.  
10 \*<sup>#</sup>  $P < 0.05$ . (C) CD18<sup>-/-</sup> peritoneal macrophages behave similar to BM-derived macrophages  
11 regarding the impaired phagocytosis. Mature peritoneal macrophages were obtained as described  
12 in the Supplementary material and methods section, and co-incubated with apoptotic PMN. After  
13 45 min, non-adherent cells were removed by washing. Adherent cells were collected from the  
14 well bottoms, stained and analysed by flow cytometry (for details see Supplementary material  
15 and methods given below). Phagocytosis was assessed by calculating the percentage of  
16 macrophages phagocytosing PMN among total macrophages counted. Bars indicate median of  
17 each cohort. \*\*  $P < 0.005$ . (D) Representative flow-cytometric raw data of the phagocytosis assay  
18 presented in (C) are provided. Peritoneal macrophages were stained using F4/80 FITC mAb;  
19 apoptotic PMN were loaded with CMRA prior to co-culturing for 45 min (for details see Supple-  
20 mentary material and methods given below). Cells appearing in the upper right quadrant of dot  
21 plots stain positive for both markers representing macrophages phagocytosing PMN (dot plots  
22 given in upper row), as also verified by fluorescence microscopy (data not shown). Besides, a dot  
23 plot showing only WT macrophages cultured without apoptotic PMN is provided as control  
24 (lower row).

1 Both release of active TGF- $\beta_1$  (supplementary data S4B) and phagocytosis (Figure S4C, D)  
2 occurred with similar differences between CD18<sup>-/-</sup> and WT for peritoneal macrophages as pre-  
3 viously found for BM-derived macrophages indicating that both peritoneal and BM-derived  
4 macrophages share identical CD18-dependent mechanisms for phagocytosis of apoptotic PMN,  
5 mediated via adhesion, and leading to the subsequent release of active TGF- $\beta_1$ , independent of  
6 their origin or stage of maturation.

7  
8 **Supplementary data 5 (Figure S5).** Ablation of CD18 function results in a reduced release of  
9 IL-8 and its murine homologues, MIP-2 and KC, from macrophages during phagocytosis of  
10 apoptotic PMN and analogously, during early phases of wound healing; however, MIP-2 and/or  
11 KC do not affect wound contraction in the murine LAD1 model. – Since PMN are almost lacking  
12 in wounds of CD18<sup>-/-</sup> mice, we were interested whether CD18 deficiency, apart from deficient  
13 TGF- $\beta_1$  release, may also result in a reduced release of other chemokines involved in PMN  
14 recruitment. (A, C) Therefore, murine MIP-2 and KC concentrations were determined in the  
15 supernatants of either CD18<sup>-/-</sup> or WT macrophages after phagocytosis of apoptotic PMN of the  
16 CD18<sup>-/-</sup> or WT genotype, using an identical procedure for lysates preparation as employed pre-  
17 viously for the measurements of TGF- $\beta_1$  (see main text, Material and methods section). (B, D) In  
18 addition, wound lysates at different time points after wounding (2 min, 2 h, 24 h, 5 and 7 days)  
19 were subjected to MIP-2- and KC-specific ELISAs according to the manufacturer's protocols (all  
20 R&D Systems). (E) Human PMN and macrophages were isolated according to the Supplement-  
21 ary material and methods section. PMN were rendered apoptotic and, after incubation with  
22 CD18-blocking mAbs at saturating concentration, were subjected to the phagocytosis assay with  
23 macrophages, which had either been pre-incubated with CD18-blocking mAbs or had been left  
24 untreated. IL-8 was determined from supernatants after 24 h of co-culture using specific ELISA

1 for human IL-8 (R&D Systems). (F) IL-8 homologues were shown to stimulate myofibroblast  
2 differentiation in the chicken (Feugate *et al*, 2002) a model system which is considered to reflect  
3 IL-8 effects/biology closely to the human situation (Li *et al*, 2005). For ethical reasons, it is not  
4 possible to test exogenously injected recombinant human IL-8 for its myofibroblast different-  
5 iation-inducing properties and its effect on wound contraction in standardised wounds of LAD1  
6 patients. In order to circumvent this difficulty, we assessed wound contraction in the murine  
7 LAD1 model after injection of the murine IL-8 homologues, MIP-2 and KC alone or in com-  
8 bination. To locally supply MIP-2 and/or KC at the wound site, carrier-free recombinant murine  
9 MIP-2 or KC (Peprotech, Rocky Hill, NJ) were injected subcutaneously at 3 sites around the  
10 wounds, allowing to infiltrate wound margins at a total dose of 1 µg/wound (for doses and  
11 procedure see (Khan *et al*, 2004), 2 min after wounding. This time point was selected, as wound  
12 lysates revealed significantly lower amounts of MIP-2 and KC in wounds of CD18<sup>-/-</sup> mice  
13 compared to WT, while at 24 h and at any studied later time points (5 and 7 days) no significant  
14 reduction in MIP-2 and KC concentration was found in wound lysates of CD18<sup>-/-</sup> mice. – We did  
15 not observe any rescuing effect of MIP-2, KC or MIP-2 and KC regarding the increased wound  
16 sizes in CD18<sup>-/-</sup> mice indicating that the initial decrease in the IL-8 homologues MIP-2 and KC  
17 had most likely not been responsible for the delay in wound contraction in CD18<sup>-/-</sup> mice.

18  
19 **Supplementary data 6 (Figure S6).** Bleeding time and platelet numbers are normal in CD18<sup>-/-</sup>  
20 mice. (A) Platelet counts were determined from EDTA-treated whole blood samples of CD18<sup>-/-</sup> or  
21 WT mice. (B) To assess gross platelet function in CD18<sup>-/-</sup> and WT mice, subaquatic bleeding  
22 times were measured. Mice were immobilised in a device and their tails were kept in 37°C warm  
23 water for 2 min. The tails were then incised with a razor blade to induce bleeding from the tail  
24 vein and immediately after incising, tails were again put in the water. The time from the start of

1 bleeding until the bleeding ceased was assessed. Data are depicted as the mean  $\pm$  SD; n.s., non-  
2 significant.

3  
4 **Supplementary data 7 (Figure S7).** In co-cultures of macrophages with apoptotic PMN,  
5 adhesion is detected at 15 min whereas at 45 min phagocytosis prevails. (A) To assess frequency  
6 of adhesion and phagocytosis at different time points of co-culturing of macrophages and apo-  
7 ptotic PMN, co-culture assays were performed as described previously (Fig. 6 of main text;  
8 supplementary material and methods). Prior to co-culturing, macrophages were stained using  
9 F4/80 TriColor (clone Cl:A3-1; Caltag) mAb and apoptotic PMN were loaded with CMRA. After  
10 15 min or 45 min, respectively, non-adherent PMN were removed from plates by washing and  
11 the remaining cell conjugates were stained using Ly-6G FITC (clone 1A8; BD Pharmingen) to  
12 specifically stain PMN that were still extracellularly adherent and not yet ingested. Samples were  
13 then subjected to FACS analysis. Panel A shows all CMRA<sup>±</sup> events (i.e. all cell-conjugates that  
14 include CMRA-loaded PMN either in an adhesional or in a phagocytotic process) as detected by  
15 FACS and subsequently gated upon. Cell-conjugates gated for CMRA positivity were then  
16 further analysed for their expression of Ly-6G indicating binding of apoptotic PMN (Ly-6G<sup>±</sup>) to  
17 macrophage cell surface (events counted within boxes, given as percentage of total CMRA<sup>±</sup> cell  
18 conjugates detected). PMN already ingested by macrophages are only detected as CMRA<sup>±</sup> but do  
19 not stain for Ly-6G. This data shows that after 15 min of co-culturing, adhesive processes  
20 dominate by far (>90%) between macrophages and apoptotic PMN, independent of the CD18  
21 expression. In contrast, phagocytosis of PMN by macrophages prevails after 45 min of co-  
22 culturing. Interestingly, phagocytosis in the WT setting was slightly higher (>95%, with a re-  
23 maining adhesion below 5%) than in the CD18<sup>-/-</sup> setting (>85%, with a remaining adhesion below  
24 15%), although this difference was not quite significant when all analysed samples (n=3) were

1 subjected to statistics ( $P>0.05$ ). Representative dot plots are given. (B) PMN adherence to and  
2 phagocytosis by macrophages was assessed in immunofluorescence microscopy. For this, apo-  
3 ptotic PMN (loaded with LysoSensor Green, a pH-dependent fluorescent dye) were incubated  
4 with macrophages for 15 min to assess adhesion and 45 min to investigate phagocytosis. After  
5 co-culture, non-adherent cells were washed and microscopic pictures were recorded digitally  
6 overlaying differential interference contrast (DIC, using Nomarsky optics) with fluorescence  
7 pictures. Phagocytosis did almost not occur in WT or CD18<sup>-/-</sup> co-cultures at 15 min, as shown by  
8 the absence or very low intensity level of fluorescence at this time point (upper panel, left: FITC,  
9 and right: merge DIC and FITC; representative pictures for both CD18<sup>-/-</sup> and WT co-cultures),  
10 indicating that LysoSensor Green specifically distinguishes between adhesion (no fluorescence)  
11 and phagocytosis (pH-dependent increase in fluorescence). At 45 min the dominating event was  
12 phagocytosis, as pointed out by the increase in the fluorescence intensity of the LysoSensor  
13 loaded in PMN entering the acidified medium of the activated macrophage. Also an impaired  
14 capacity of the CD18<sup>-/-</sup> macrophages to engulf CD18<sup>-/-</sup> apoptotic PMN could be observed (middle  
15 panel, left: FITC, and right: merge DIC and FITC) when compared with the WT co-culture  
16 (lower panel, left: FITC and right: merge DIC and FITC). The bar represents 40  $\mu$ m.

## 1 **Supplementary material and methods**

### 2 ***Isolation of peritoneal macrophages***

3 Peritoneal macrophages served as a source of *in vivo*-generated mature macrophages (Rutherford  
4 *et al*, 1993), and were obtained according to established procedures (Cohn and Benson, 1965).  
5 Briefly, the peritoneal cavities of CD18<sup>-/-</sup> and WT mice (n=4) were lavaged with 5 ml ice-cold  
6 calcium/magnesium-free PBS. Peritoneal cells were collected by centrifugation of the lavage  
7 fluid and resuspended at a concentration of 2x10<sup>6</sup>/ ml DMEM supplemented with 10% heat-  
8 inactivated FCS, 2% L-Glutamine, 1% penicillin/streptomycin and 1% non-essential aminoacids.  
9 The cell suspension was plated onto 24 well dishes at 2x10<sup>6</sup>/ ml/well and left to adhere for 2 h at  
10 37°C in a humidified 5% CO<sub>2</sub> atmosphere. Non-adherent cells were removed by washing 3 times  
11 with PBS. Adherent cells were then incubated over night in fresh DMEM/FCS and used for co-  
12 culture experiments the next day.

13

### 14 ***Adhesion and phagocytosis assays***

15 For fluorescence microscopy, 6 days old mature WT and CD18<sup>-/-</sup> mouse macrophages were  
16 plated out on poly-D-lysine-coated slides at 10<sup>6</sup>cells/ml DMEM and left to adhere for 24h at  
17 37°C in a humidified 5% CO<sub>2</sub> atmosphere. PMNs isolated as described above from WT and  
18 CD18<sup>-/-</sup> mice were stained with the intracellular dye CMRA (red/orange fluorescing) (Molecular  
19 Probes) at 5 μM final concentration. Staining was done at 37°C and 5% CO<sub>2</sub> for 30 min, followed  
20 by washing. PMNs were then rendered apoptotic by ageing as described and co-cultured with  
21 macrophages for 15 min and 45 min to assess adhesion and phagocytosis, respectively. After co-  
22 culture, non-adherent PMN were washed, slides were covered with fluorescent mounting medium  
23 (Dako) and the proportion of macrophages ingesting PMN was counted, in an analogous fashion  
24 as previously described (Fadok *et al*, 1998; Fadok *et al*, 2001), only this time using immuno-



1 fluorescence microscopy with a Zeiss Axioscop 2 microscope equipped with appropriate fluor-  
2 escence filters. Microscopic pictures were recorded digitally overlaying differential interference  
3 contrast (DIC, using Nomarsky optics) with fluorescence pictures as supported by AxioVision®  
4 software (Carl Zeiss Inc.).

5 In another set of experiments PMN were loaded with the fluorescent pH indicator LysoSensor  
6 Green (DND-189; Molecular Probes) at 1 μM final concentration. Staining was done at 37°C and  
7 5% CO<sub>2</sub> for 30 min, followed by washing. This dye, not fluorescent under neutral pH conditions,  
8 accumulates in acidic organelles, especially lysosomes, as a result of protonation and exhibits a  
9 pH-dependent increase in fluorescence intensity upon acidification. PMN were then and co-  
10 cultured with macrophages for 15 min and 45 min to assess adhesion and phagocytosis, re-  
11 spectively. In this system we could distinguish between the process of adhesion – where the dye  
12 does not reach the lysosomal machinery of the macrophages and thus is not induced to fluoresce  
13 – and phagocytosis, where labelled PMN enter the phagocyte and, in the acidified milieu of the  
14 activated macrophage, fluorescence is induced.

15 For additional large-scale quantification, co-cultures were also subjected to FACS analyses after  
16 the indicated interaction times. Macrophages and PMN were adjusted separately to a con-  
17 centration  $1 \times 10^8$  cells/ml. CMRA (orange-fluorescing; Molecular Probes) was added to the PMN  
18 suspension in order to obtain 1 μM final concentration. Staining was done at 37°C and 5% CO<sub>2</sub>  
19 for 30 min, followed by one washing and subsequent co-culture as depicted above. In a second  
20 setting, PMN were not stained before co-cultures. In this case, cell conjugates were stained  
21 immediately after co-cultures using Ly-6G FITC (clone 1A8; BD Pharmingen) at 1 μg/ml to  
22 specifically stain PMN that still were extracellularly adherent and not yet ingested. After the  
23 indicated interaction periods, cell conjugates were additionally double-stained with F4/80  
24 TriColor (clone Cl:A3-1; Caltag) to dye macrophages and with annexin-V APC to detect extra-

1 cellularly adherent PMN. Samples were then measured with a CellQuest Pro®-supported FACS-  
2 Calibur.

3

#### 4 ***Isolation of human monocytes and PMN***

5 Human monocytes and PMN were isolated as described elsewhere (Ezekowitz *et al*, 1985).  
6 Briefly, fresh whole blood from healthy volunteers was centrifuged on Ficoll-Paque (Amersham,  
7 Freiburg, Germany). Mononuclear cells were resuspended in RPMI 1640 supplemented with 2%  
8 L-Glutamine and Penicillin/Streptomycin 100 U/μg/ml at  $2 \times 10^6$ /ml, left to adhere for 1 h in 24-  
9 well tissue culture plates (Nunc) and then washed to remove non-adherent cells. Cells were  
10 further cultivated at 37°C and 5% CO<sub>2</sub> for 5 days. After 5 days the adherent cells were assessed  
11 for the mature macrophage marker 25F9 (Zwadlo *et al*, 1985) by flow cytometry. Seventy to 80%  
12 of the cells were positive for 25F9 (data not shown). Mononuclear cells from two LAD1 patients  
13 were a kind gift from Dr. Wilhelm Friedrich, Dept. of Pediatrics, University of Ulm). Rest  
14 expression of CD18 on these cells, as assessed by flow cytometry using PE-coupled anti-CD18  
15 mAb (clone 6.7; BD Pharmingen) was less than 0.5% in both patients thus representing severe  
16 type LAD1.

17 PMN were obtained by adding the pellet from the Ficoll-Paque gradient to 3% dextran  
18 (Amersham) and further lysis with ammonium chloride buffer of the remaining erythrocytes.  
19 Apoptosis of PMN was induced by aging for 20 h of  $5 \times 10^6$ /ml PBS at 37°C and was assessed by  
20 flow cytometry by using annexin-V FITC (BD Pharmingen). For adhesion and phagocytosis  
21 assays, PMN were stained with the intracellular dye CMRA (Molecular Probes).

22

23

24

25

1 ***Adhesion and phagocytosis assay with human monocytes/macrophages and PMN***

2 Two different anti-CD18 mAb – clone IB4 as an F(ab)<sub>2</sub> fragment to avoid F<sub>c</sub> receptor binding  
3 (Ancell, Bayport, MN) (Wright *et al*, 1983) and clone TS1/18 (BioLegend, San Diego, CA)  
4 (Diacovo *et al*, 1996) – were used in separate serum-free co-culture experiments to block CD18  
5 either on macrophages, PMN or both. PMN were incubated with saturating concentrations of IB4  
6 (10 µg/ml), respectively TS1/18 (20 µg/ml) for 15 min (both achieving identically high blocking  
7 of CD18 receptor in these respective concentrations), washed and co-cultured in different experi-  
8 mental settings. For adhesion assay, macrophages were incubated with PMN for 15 min at 37°C,  
9 5% CO<sub>2</sub> and humidified atmosphere, detached by scrapping, stained for 25F9 and analysed by  
10 flow cytometry. For phagocytosis assay, the incubation time was 45 min. Cytokine release was  
11 measured after 24 h of co-culture under the same conditions.

12

13

14 ***Characterisation of BM-derived macrophages from WT and CD18<sup>-/-</sup> mice***

15 Six-day-old BM-derived macrophages from WT and CD18<sup>-/-</sup> mice were stained for the macro-  
16 phage-specific marker F4/80 (clone Cl:A3-1, conjugated with Alexa Fluor 488; Caltag Lab-  
17 oratories GmbH, Germany), for the macrophage/monocyte marker 2 (clone MOMA-2 FITC;  
18 Serotec, Düsseldorf, Germany), for the LFA-1 and MAC-1 ligand ICAM-1 (CD54 PE, clone  
19 3E2; Caltag) and for the scavenger receptor B (CD36 FITC, clone CRF D-2712; BD Pharm-  
20 ingen) and the expression of these markers was then analysed with a CellQuest Pro®-supported  
21 FACSCalibur.

22

23

24

## 1 **References to supplementary data**

- 2 Cohn ZA, Benson B (1965) The in vitro differentiation of mononuclear phagocytes. 3. The  
3 reversibility of granule and hydrolytic enzyme formation and the turnover of granule  
4 constituents. *J Exp Med* **122**: 455-466
- 5 Demuth A, Goebel W, Beuscher HU, Kuhn M (1996) Differential regulation of cytokine and  
6 cytokine receptor mRNA expression upon infection of bone marrow-derived macrophages  
7 with *Listeria monocytogenes*. *Infect Immun* **64**: 3475-3483
- 8 Diacovo TG, Roth SJ, Buccola JM, Bainton DF, Springer TA (1996) Neutrophil rolling, arrest,  
9 and transmigration across activated, surface-adherent platelets via sequential action of P-  
10 selectin and the beta 2-integrin CD11b/CD18. *Blood* **88**: 146-157
- 11 Ezekowitz RA, Sim RB, MacPherson GG, Gordon S (1985) Interaction of human monocytes,  
12 macrophages, and polymorphonuclear leukocytes with zymosan in vitro. Role of type 3  
13 complement receptors and macrophage-derived complement. *J Clin Invest* **76**: 2368-2376
- 14 Fadok VA, Bratton DL, Konowal A, Freed PW, Westcott JY, Henson PM (1998) Macrophages  
15 that have ingested apoptotic cells in vitro inhibit proinflammatory cytokine production  
16 through autocrine/paracrine mechanisms involving TGF-beta, PGE2, and PAF. *J Clin*  
17 *Invest* **101**: 890-898
- 18 Fadok VA, de Cathelineau A, Daleke DL, Henson PM, Bratton DL (2001) Loss of phospholipid  
19 asymmetry and surface exposure of phosphatidylserine is required for phagocytosis of  
20 apoptotic cells by macrophages and fibroblasts. *J Biol Chem* **276**: 1071-1077
- 21 Feugate JE, Li Q, Wong L, Martins-Green M (2002) The cxc chemokine cCAF stimulates  
22 differentiation of fibroblasts into myofibroblasts and accelerates wound closure. *J Cell*  
23 *Biol* **156**: 161-172

1 Iyoda T, Shimoyama S, Liu K, Omatsu Y, Akiyama Y, Maeda Y, Takahara K, Steinman RM,  
2 Inaba K (2002) The CD8+ dendritic cell subset selectively endocytoses dying cells in  
3 culture and in vivo. *J Exp Med* **195**: 1289-1302

4 Katagiri K, Kinashi T, Irie S, Katagiri T (1996) Differential regulation of leukocyte function-  
5 associated antigen-1/ intercellular adhesion molecules-1-dependent adhesion and  
6 aggregation in HL-60 cells. *Blood* **87**: 4276-4285

7 Khan AI, Kerfoot SM, Heit B, Liu L, Andonegui G, Ruffell B, Johnson P, Kubes P (2004) Role  
8 of CD44 and hyaluronan in neutrophil recruitment. *J Immunol* **173**: 7594-7601

9 Li QJ, Yao M, Dueck M, Feugate JE, Parpura V, Martins-Green M (2005) cCXCR1 is a receptor  
10 for cIL-8 (9E3/cCAF) and its N- and C-terminal peptides and is also activated by hIL-8  
11 (CXCL8). *J Leukoc Biol* **77**: 421-431

12 Painter RG, Whisenand J, McIntosh AT (1981) Effects of cytochalasin B on actin and myosin  
13 association with particle binding sites in mouse macrophages: implications with regard to  
14 the mechanism of action of the cytochalasins. *J Cell Biol* **91**: 373-384

15 Rutherford MS, Witsell A, Schook LB (1993) Mechanisms generating functionally  
16 heterogeneous macrophages: chaos revisited. *J Leukoc Biol* **53**: 602-618

17 Wright SD, Rao PE, Van Voorhis WC, Craigmyle LS, Iida K, Talle MA, Westberg EF, Goldstein  
18 G, Silverstein SC (1983) Identification of the C3bi receptor of human monocytes and  
19 macrophages by using monoclonal antibodies. *Proc Natl Acad Sci U S A* **80**: 5699-5703

20 Zwadlo G, Brocker EB, von Bassewitz DB, Feige U, Sorg C (1985) A monoclonal antibody to a  
21 differentiation antigen present on mature human macrophages and absent from  
22 monocytes. *J Immunol* **134**: 1487-1492

23

Fig. S1

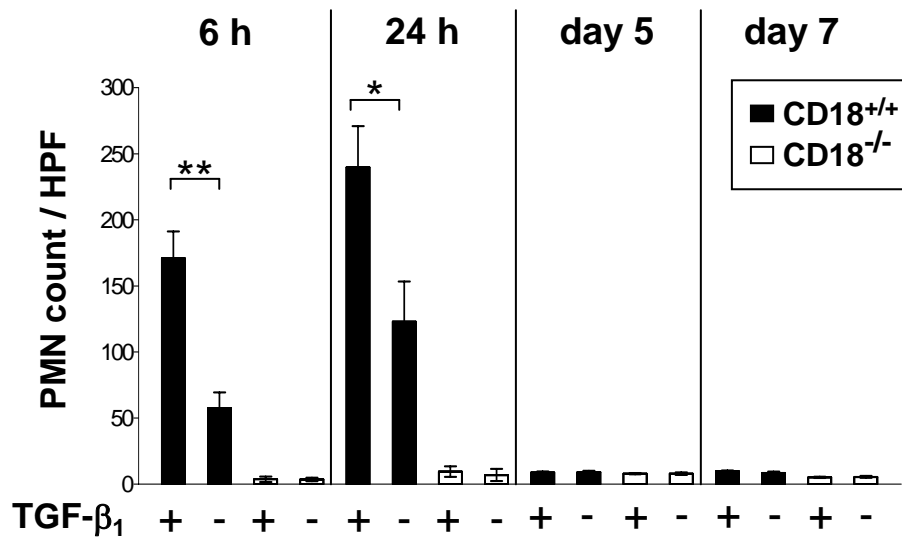

Fig. S2

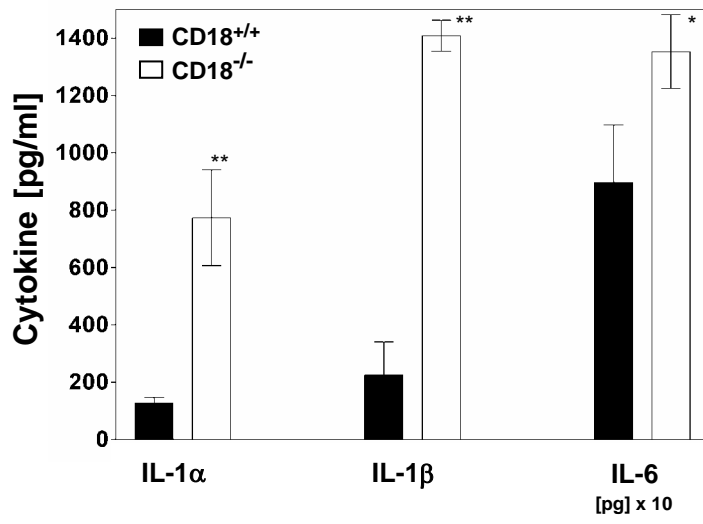

**A**

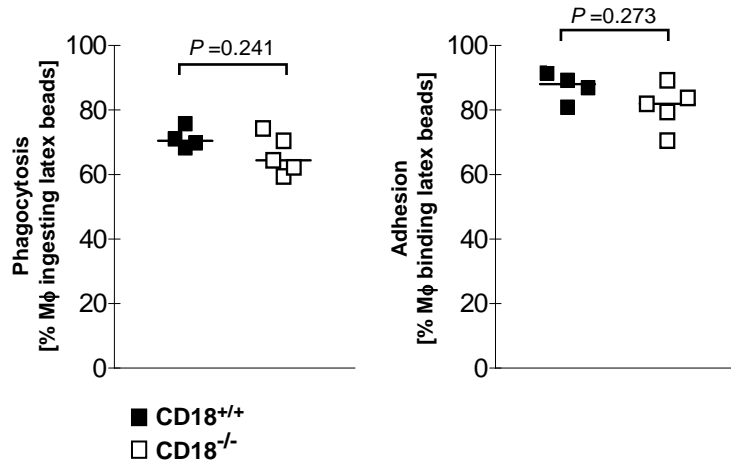

**B**

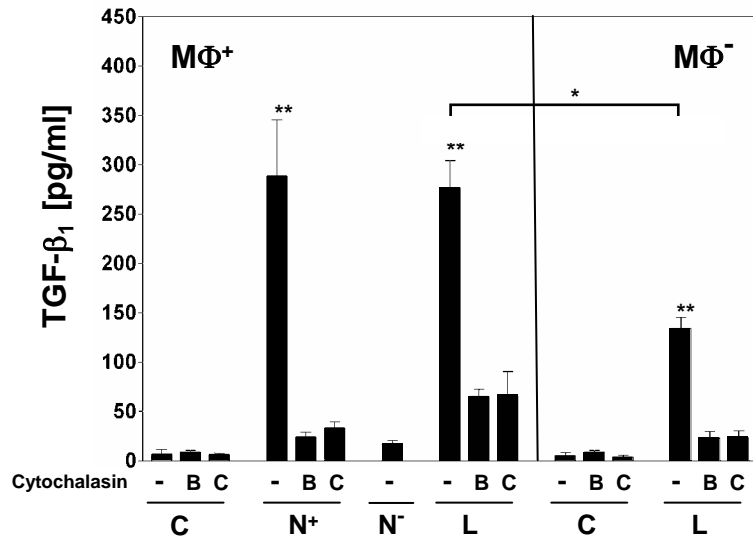

**C**

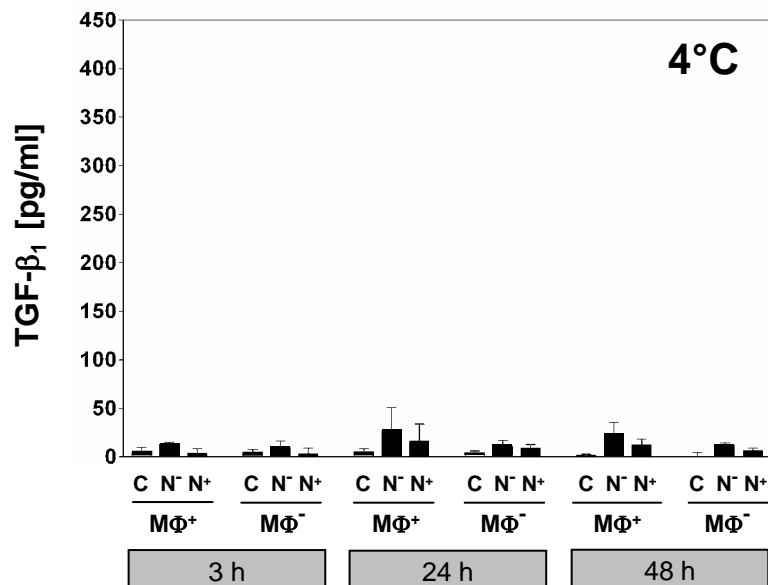



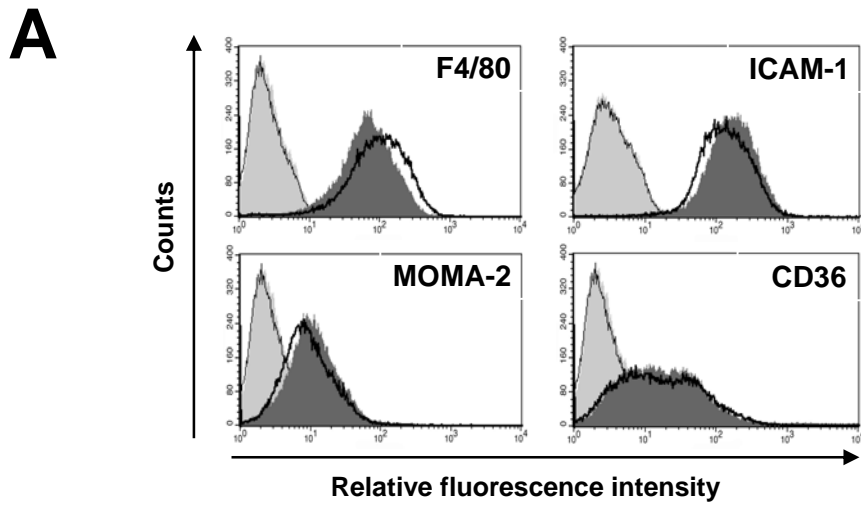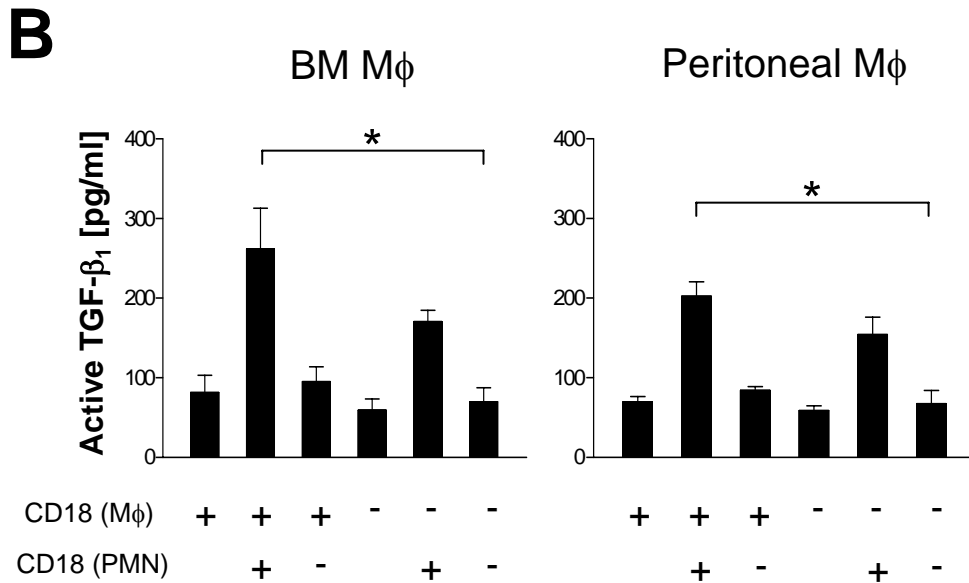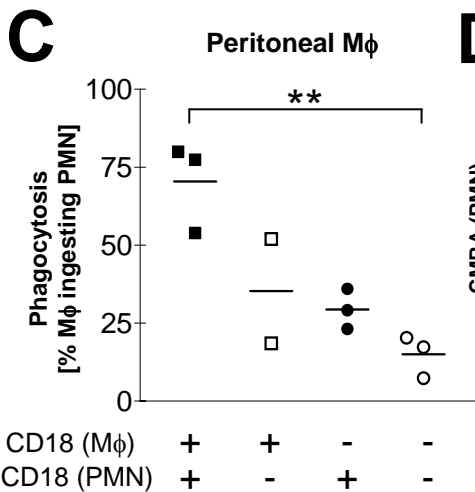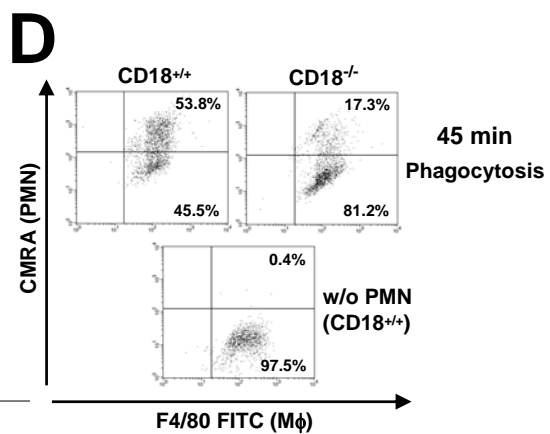

Fig. S5

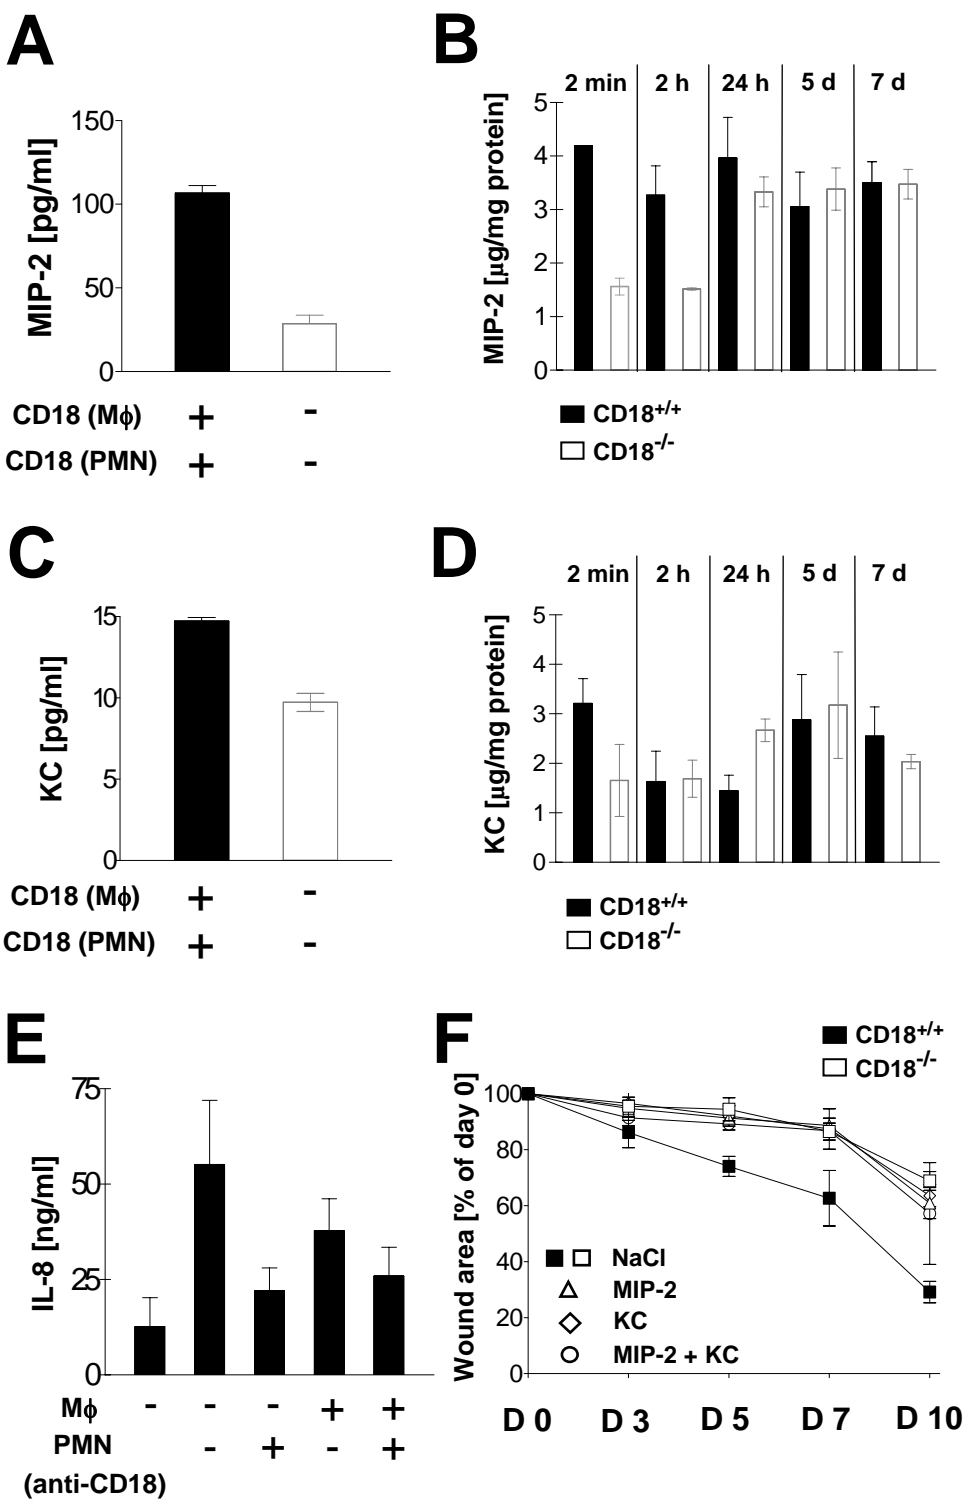

Fig. S6

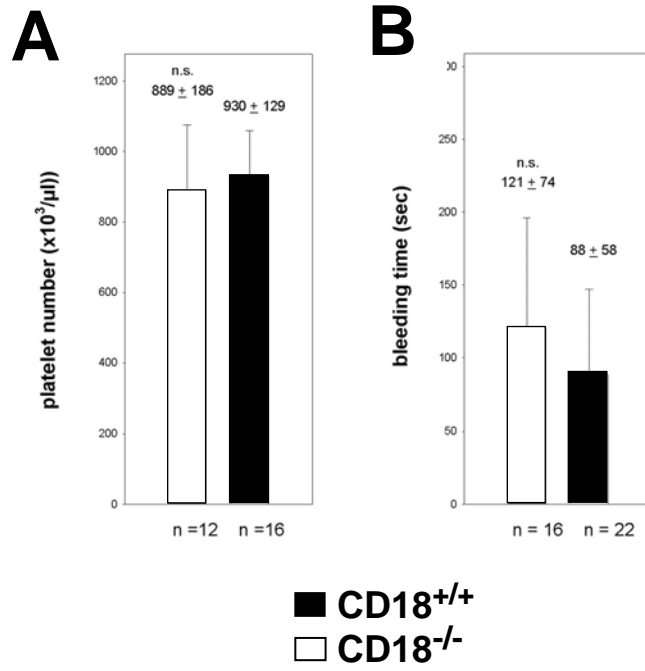

**A**

Displayed (gated) are all CMRA<sup>+</sup> events  
(i.e. cell conjugates with CMRA-loaded PMN)

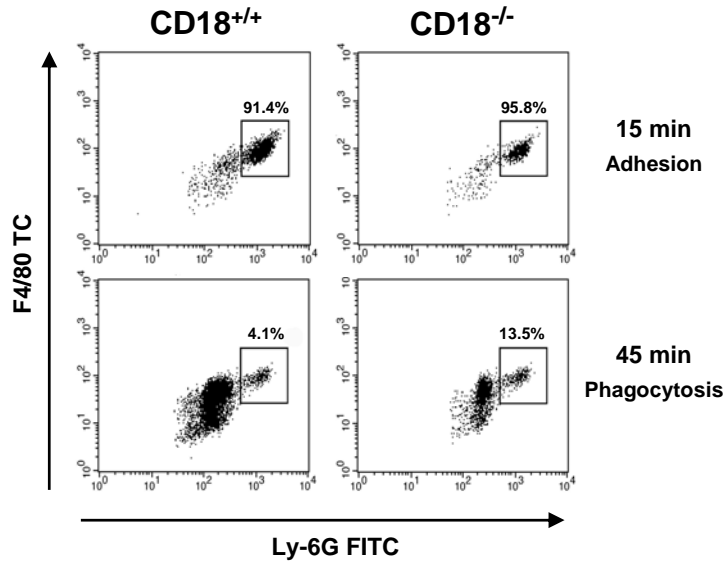

**B**

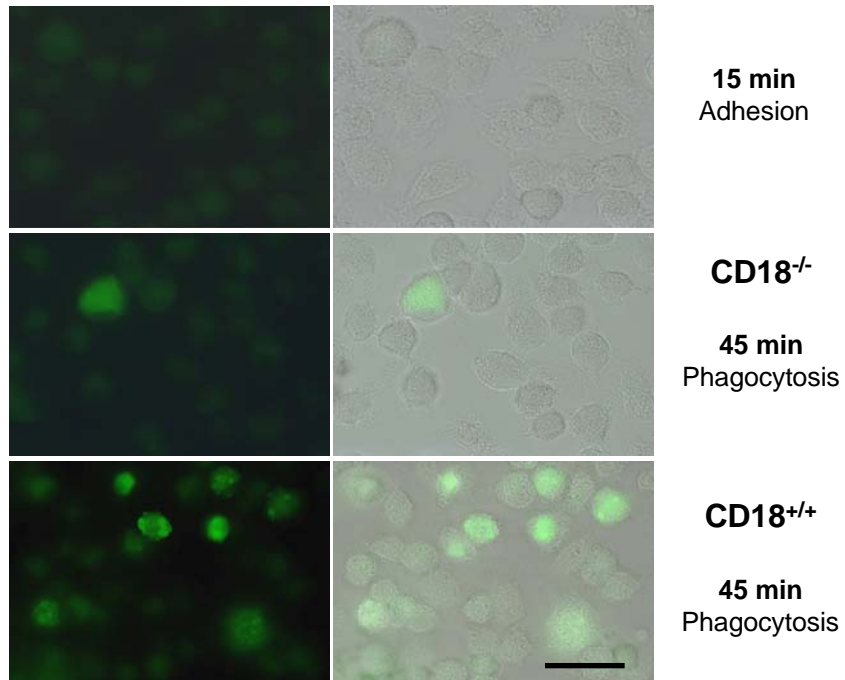

Supplement: 7600809s1.pdf [file 7600809s1.pdf]
